# Supplementary material for: Enhanced energy storage density of all-organic fluoropolymer composite dielectric via introducing crosslinked structure
Source: Royal Society of Chemistry journal article supplement (doi:10.1039/d1ra01423d), 2021-01-01
Supplement: d1ra01423d1.pdf [file d1ra01423d1.pdf]

## Supplementary Informations

Enhanced Energy Storage Density of All-Organic Fluoropolymer

Composite Dielectric via Introducing Crosslinked Structure

***Xiongjie Li<sup>a,b</sup>, Ying Yang<sup>a\*</sup>, Yiping Wang<sup>a</sup>, Shuting Pang<sup>a,b</sup>, Jingjing Shi<sup>a,b</sup>, Xinch  
Ma<sup>a</sup>, and Kongjun Zhu<sup>a</sup>***

*<sup>a</sup>State Key Laboratory of Mechanics and Control of Mechanical Structures, Nanjing  
University of Aeronautics and Astronautics, Nanjing 210016, P. R. China*

*<sup>b</sup>College of Materials Science and Technology, Nanjing University of Aeronautics and  
Astronautics, Nanjing 210016, P. R. China*

\*Corresponding author: Ying Yang

E-mail: [yingyang@nuaa.edu.cn](mailto:yingyang@nuaa.edu.cn)

Tel: +86-25-84891937

### ***Synthesis of unsaturated PVDF***

The unsaturated PVDF was synthesized via a nucleophilic substitution reaction. First, 5 g copolymer P(VDF-CTFE) were dissolved in NMP for 0.5 h at room temperature and formed a transparent and homogeneous solution. Second, 13.4 mmol of TEA were added into the P(VDF-CTFE) solution to ensure complete dispersion. The mixture was further stirred vigorously for 24 h at 50 °C to yield a homogenous mixture of unsaturated PVDF and residual TEA. Afterwards, the mixture was precipitated in dilute hydrochloric acid solution to remove the residual TEA. The product was dissolved in acetone followed by precipitation in methanol three times and dried at 50 °C for 12 h in a vacuum oven.<sup>30</sup>

30 S.B. Tan, J.J. Li, G.X. Gao, H.Y. Li and Z.C. Zhang, *J. Mater. Chem.*, 2012, **22**, 18496-18504.

### *Fabrication and crosslinking of unsaturated PVDF*

A typical crosslinking reaction was conducted as followings. First, 0.75 g PVDF containing unsaturation powders were dispersed in DMF and stirred for 5 h to completely dissolve at room temperature. Then, 37.5 mg BPO was slowly added into the PVDF containing unsaturation solution. The polymer solution was cast on a glass plate and dried at 90 °C for 6 h. After that, the films were heated in a vacuum oven at 160 °C for 12 h to allow the thermal crosslinking reaction. The prepared samples were finally treated at 180 °C under vacuum for 24 h to remove residual BPO and crosslinking byproducts.<sup>30</sup>

The decomposition of initiator

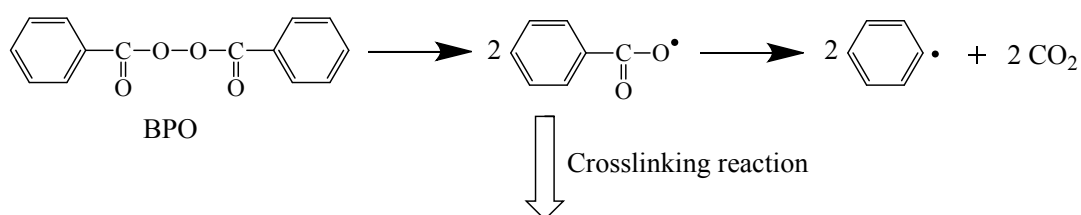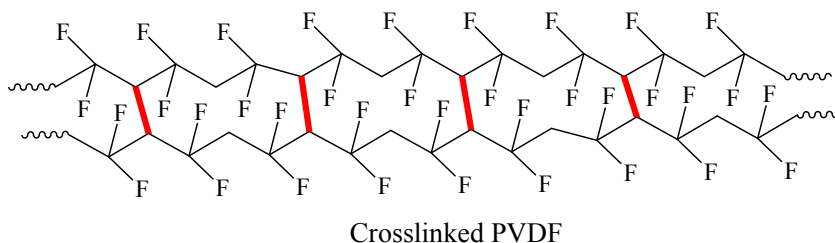

### ***Synthesis of PVDF terpolymer***

The PVDF terpolymer was prepared via a hydrogenation process. 5 g P(VDF-CTFE) and 0.25 g AIBN were dispersed in 150 mL purified THF at room temperature for 0.5 h and degassed three times with dry nitrogen-vacuum cycles. Next, *n*Bu<sub>3</sub>SnH was injected into the reaction system using a syringe, and the reaction was kept stirring at 60 °C for 24 h. The mixture was slowly poured into water to precipitate a polymer, and extracted with *n*-hexane in a Soxhlet extractor for 12 hours to remove residual *n*Bu<sub>3</sub>SnH. After drying in a vacuum oven at 80 °C for 24 h, the PVDF terpolymer was synthesized [31].

31 Y. Lu, J. Claude, Q. Zhang and Q. Wang, *Macromolecules*, 2006, **39**, 6962-6968.

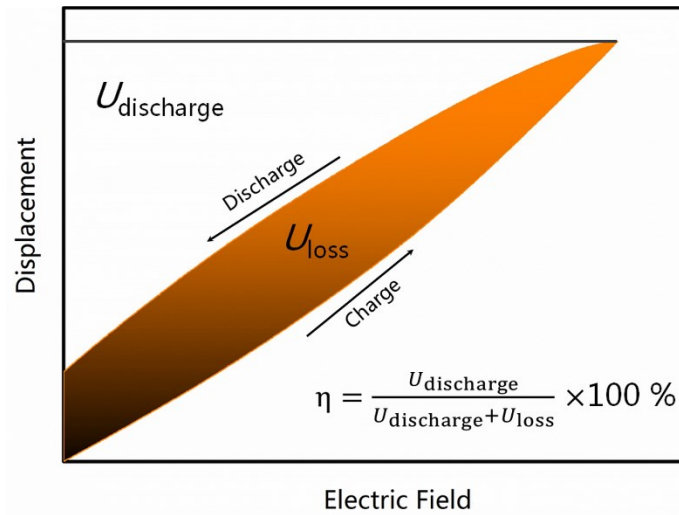

**Fig. S1** *D-E* loop of a dielectric material.  $U_{\text{discharge}}$  is the discharged energy density, and  $U_{\text{loss}}$  is the energy loss. The value of  $U_{\text{discharge}}$  and  $U_{\text{loss}}$  can be obtained by integrating calculation.  $U_{\text{discharge}} + U_{\text{loss}}$  is the totally charged energy density, and the discharge-charge efficiency ( $\eta$ ) defines the content of  $U_{\text{discharge}}$ .

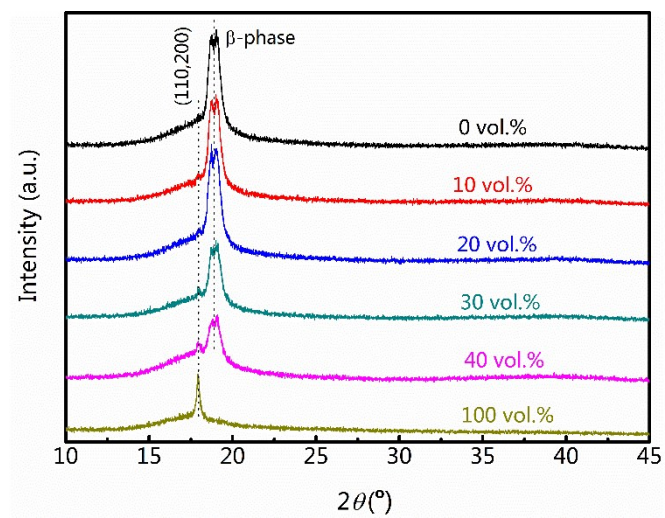

**Fig. S2** XRD patterns of the composite films with different c-PVDF volumes.

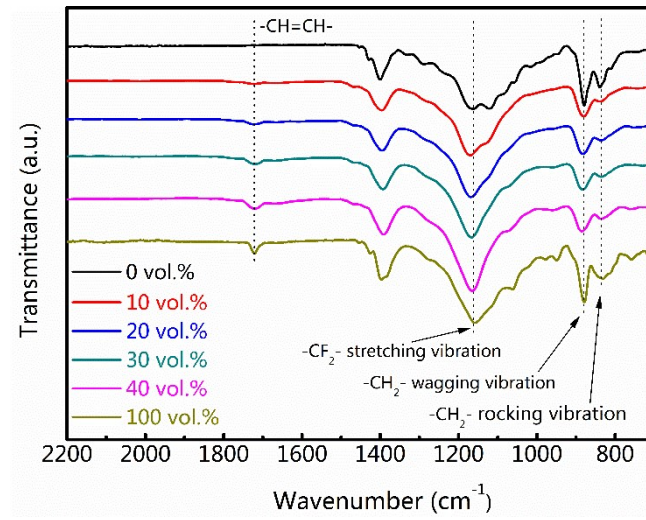

**Fig. S3** FTIR results of PVDF-based polymers and polymer composites.
